# Supplementary material
Source: publisher figshare collection journal article supplement (https://acs.figshare.com/ndownloader/files/4242553)
Supplement: Supplementary file 1 [file 4242553]

# Cell Permeable Ln (III) Chelate Functionalized Quantum Dots as Multimodal Imaging Agents

*Graeme J. Stasiuk<sup>†</sup>, Sudarsan Tamang<sup>§</sup>, Daniel Imbert<sup>‡</sup>, Cathy Poillot<sup>‡</sup>, Marco Giardiello<sup>†</sup>, Céline Tisseyre<sup>‡</sup>, Emanuel Barbier<sup>‡</sup>, Pascal H. Fries<sup>†</sup>, Michel De Waard<sup>‡</sup>, Peter Reiss<sup>§</sup> and Marinella Mazzanti<sup>†\*</sup>*

<sup>†</sup> CEA-Grenoble, INAC, SCIB, Laboratoire de Reconnaissance Ionique et Chimie de Coordination,  
UMR-E 3 CEA-UJF, 38054 Grenoble Cedex 9, France.

<sup>§</sup> CEA Grenoble, INAC, SPrAM, Laboratoire d'Electronique Moléculaire, Organique et Hybride UMR  
5819 CEA-CNRS-UJF

<sup>‡</sup> Grenoble Institute of Neuroscience, Inserm U836, Site Santé de la Tronche, bâtiment Edmond J. Safra,  
Chemin Fortuné Ferrini, BP170, 38042

## Ligand Synthesis

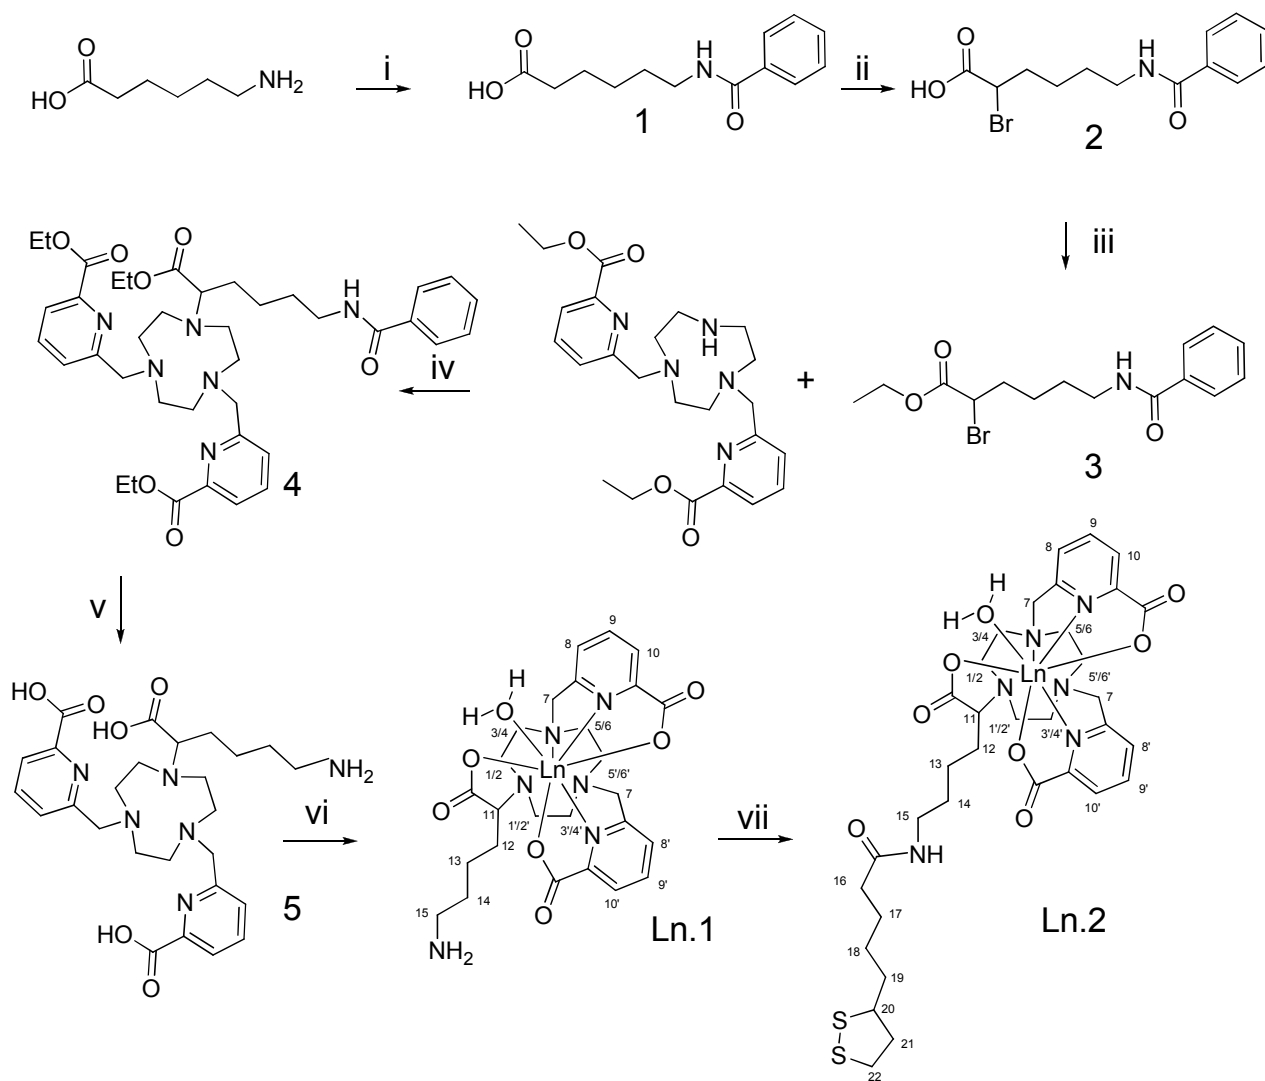

i) Benzoyl chloride, NaOH, H<sub>2</sub>O. ii) Br<sub>2</sub>, PBr<sub>3</sub>, CCl<sub>4</sub>. iii) EtOH, H<sub>2</sub>SO<sub>4</sub>. iv) K<sub>2</sub>CO<sub>3</sub>, KI, MeCN. v) HCl.  
vi) LnCl<sub>3</sub>·6H<sub>2</sub>O, H<sub>2</sub>O, pH 5.5. vii) DHLA, EDCl, DMAP, DMF/H<sub>2</sub>O

Scheme S1. Synthesis of amino appended bptacn ligand

### 6-benzamidohexanoic acid(1)

A solution of NaOH (16.8 g, 0.419 moles) in water (17 mL) was added to a solution of 6-aminohexanoic acid (25.0 g, 0.191 moles) in of water (500 mL). The solution temperature was lowered to 10°C and benzoyl chloride (29.5 g, 24.30 mL, 0.201 moles), was added dropwise. The desired product precipitated out of the solution as a white powder and was collected and washed 3 times with water

followed by 3 times with petroleum ether and then dried under vacuum overnight. Yield = 30.45 g, 68 %.  $\delta_{\text{H}}$  (MeOD; 200 MHz, 298 K) 7.78 (m, 2H,  $H_{\text{ar}}$ ), 7.45 (m, 3H,  $H_{\text{ar}}$ ), 3.42 (t,  $^3J_{\text{HH}} = 6.9$  Hz, 2H,  $\text{NHCH}_2$ ), 2.24 (t,  $^3J_{\text{HH}} = 7.6$  Hz, 2H,  $\text{CH}_2\text{CO}_2\text{H}$ ), 1.66 (m, 4H,  $\text{CH}_2\text{CH}_2\text{CH}_2\text{CH}_2\text{CH}_2$ ), 1.46 (m, 2H,  $\text{CH}_2\text{CH}_2\text{CH}_2\text{CH}_2$ );  $m/z$  (ESMS)  $[\text{M}+\text{H}]^+$  236.5

### **6-benzamido-2-bromohexanoic acid (2)**

6-benzamidohexanoic acid (2.4 g, 0.010 moles) and phosphorous tribromide (3.03 g, 1.06 mL, 0.012 moles) were dissolved under argon in  $\text{CCl}_4$  (20 mL), in a 250 mL three neck round bottom flask, equipped with a reflux condenser bearing a calcium chloride drying tube. Bromine (3.56 g, 1.15 mL, 0.022 moles), was added slowly in three portions to the reaction mixture over 30 minutes at  $0^\circ\text{C}$ . After this period the reaction was heated to reflux ( $85^\circ\text{C} - 90^\circ\text{C}$ ) for 18 hours. After cooling, the reaction mixture was added to 10 mL of chloroform and then was poured carefully into approx 50 mL of methanol and then water. The solvents were evaporated to dryness and the crude mixture was dissolved again in 100 mL water. The solution was cooled to  $0^\circ\text{C}$  to afford a white precipitate which was collected and recrystallized from 20 mL of 5% water:ethanol solution at  $-85^\circ\text{C}$  to yield the desired monohydrated carboxylic acid (2.15 g, yield 67%).  $\delta_{\text{H}}$  (MeOD; 200 MHz, 298 K) 7.82 (m, 2H,  $H_{\text{ar}}$ ), 7.52 (m, 3H,  $H_{\text{ar}}$ ), 4.34 (t,  $^3J_{\text{HH}} = 7.1$  Hz, 1H,  $\text{CHBrCO}_2\text{H}$ ), 3.43 (t,  $^3J_{\text{HH}} = 6.0$  Hz, 2H,  $\text{NHCH}_2$ ), 2.07 (m, 2H,  $\text{CH}_2\text{CH}_2\text{CH}_2\text{CH}_2$ ), 1.67 (m, 4H,  $\text{CH}_2\text{CH}_2\text{CH}_2\text{CH}_2\text{CH}_2$ );  $m/z$  (ESMS)  $[\text{M}+\text{H}]^+ = 314.5$ .

### **Ethyl 6-benzamido-2-bromohexanoate (3)**

6-benzamido-2-bromohexanoic acid (1.35 g, 4.29 mmol), was dissolved in ethanol (100 mL).  $\text{H}_2\text{SO}_4$  (15 mL, 97%) was then added and the solution was heated to reflux for one hour. The solution was evaporated to dryness and the residue was extracted with 3 x 50 mL dichloromethane as a brown oil (0.78 g, yield 77 %).  $\delta_{\text{H}}$  ( $\text{CDCl}_3$ ; 200 MHz, 298 K) 7.81 (m, 2H,  $H_{\text{ar}}$ ), 7.51 (m, 3H,  $H_{\text{ar}}$ ), 6.23 (broad s, 1H, NH), 4.25 (m, 3H,  $\text{BrCH}$  and  $\text{CH}_3\text{CH}_2\text{O}$ ), 3.53 (q,  $J = 6.7$  Hz, 2H,  $\text{NHCH}_2$ ), 2.12 (bm, 2H,  $\text{CH}_2\text{CH}_2\text{CH}_2\text{CH}_2$ ), 1.68 (bm, 4H,  $\text{CH}_2\text{CH}_2\text{CH}_2\text{CH}_2\text{CH}_2$ ), 1.33 (t,  $J = 7.0$  Hz, 3H,  $\text{CH}_2\text{CH}_3$ );  $m/z$  (ESMS)  $[\text{M}+\text{H}]^+ 344.1$ .

**Diethyl 6,6'-((7-(6-benzamido-1-ethoxy-1-oxohexan-2-yl)-1,4,7-triazacyclononane-1,4-diyl)bis(methylene))dipicolinate (4)**

Diethyl 6,6'-((1,4,7-triazacyclononane-1,4-diyl)bis(methylene))dipicolinate (310 mg, 0.687 mmol), was dissolved in dry acetonitrile (20 mL) in the presence of dry  $K_2CO_3$  (107 mg, 0.776 mmol) under argon. A solution of ethyl 6-benzamido-2-bromohexanoate (266 mg, 0.776 mmol) in dry acetonitrile (10 mL) was then added to the solution under argon and the reaction mixture was heated to reflux for 48 hours. Upon cooling, the mixture was filtered over celite to remove  $K_2CO_3$ , the solvent was evaporated and the residue was purified *via* silica column chromatography using graduated dichloromethane:methanol as eluent (graduated from 0% to 10 % ethanol). Brown oil = 251 mg, yield 51%.  $\delta_H$  (CDCl<sub>3</sub>; 200 MHz, 298 K) 7.89 (br m, 8H), 7.43 (br m, 3H), 4.35 (q,  $^3J_{HH} = 7.1$  Hz, 4H,  $CH_3CH_2O$ ), 4.06 (q,  $^3J_{HH} = 7.2$  Hz, 2H,  $CH_3CH_2O$ ), 3.79 (s, 4H,  $NCH_2C$ ), 3.36 (q,  $^3J_{HH} = 6.1$  Hz, 2H,  $CH_2CH_2NH$ ), 3.24 (t,  $^3J_{HH} = 6.4$  Hz, 1H,  $NCHCH_2$ ), 2.82 (bm, ring 12H), 1.61 (bm, 6H  $CH_2CH_2CH_2$ ), 1.35 (t,  $^3J_{HH} = 7.1$  Hz, 6H,  $CH_2CH_3$ ), 1.16 (t,  $^3J_{HH} = 7.1$  Hz, 3H  $CH_2CH_3$ );  $m/z$  (ESMS)  $[M+H]^+$  717.6.

**6,6'-((7-(5-amino-1-carboxypentyl)-1,4,7-triazacyclononane-1,4-diyl)bis(methylene))dipicolinic acid (5)**

Diethyl 6,6'-((7-(6-benzamido-1-ethoxy-1-oxohexan-2-yl)-1,4,7-triazacyclononane-1,4-diyl)bis(methylene))dipicolinate (200 mg, 0.279 mmol) were dissolved in 6M HCl (30 mL) and the solution was heated at reflux for 24 hours. The solvents were removed and the residue was dissolved in water (20 mL). The pH was raised to 4.5 and the resulting aqueous solution was washed 3 times with 20 mL diethyl ether.  $\delta_H$  (D<sub>2</sub>O; 200 MHz, 298 K) 8.01 (t,  $^3J_{HH} = 7.8$  Hz 2H), 7.91 (d,  $^3J_{HH} = 7.8$ , 2H), 7.62 (d,  $^3J_{HH} = 7.9$ , 2H), 4.79 (s, 4H,  $NCH_2C$ ), 3.73 (m, 13H,  $NCHCH_2$  and *ring*), 2.84 (t,  $^3J_{HH} = 7.1$  Hz 2H,  $CH_2NH_2$ ), 1.52 - 1.49 (broad m, 6H,  $CH_2CH_2CH_2$ );  $m/z$  (ESMS)  $[M+H]^+$  529.4, elemental analysis (%) calcd. for  $C_{26}H_{41}Cl_5N_6O_6 \cdot 3H_2O$ : C 40.82, H 6.19, N 10.99; found C 41.09, H 6.27, N 11.17.

## Complex Synthesis

**Ln 6,6'-((7-(5-amino-1-carboxypentyl)-1,4,7-triazacyclononane-1,4-diyl)bis(methylene))dipicolinic acid (Ln.1)**

6,6'-((7-(5-amino-1-carboxypentyl)-1,4,7-triazacyclononane-1,4-diyl)bis(methylene))dipicolinic acid (0.076 mmoles) was dissolved in water (2mL) and the pH was adjusted to 5.5 with small aliquots of 1.0 M NaOH.  $\text{LnCl}_3 \cdot 6\text{H}_2\text{O}$  (0.076 mmoles) was dissolved in 1 ml of water at pH 5.5. The two solutions were combined and the pH re-adjusted to 5.5. The solution was then stirred for 30 minutes. The solvent was removed to give a hygroscopic white powder, this was purified on a Sephadex G25 resin (equilibrated with water) to remove inorganic salts. The resulting aliquots containing the complex were combined and the solvent removed, yielding the desired Ln.1 complexes as white hygroscopic solids in yield for Ln=Gd; 69% for Ln=Eu 79% and for Ln = Tb 75%.

**Gd:**  $m/z$  (ESMS)  $[M+H]^+$  684.3

**Eu:**  $m/z$  (ESMS)  $[M+H]^+$  679.31 H NMR (200 MHz, D<sub>2</sub>O, 278 K): 25.7 (s, 1H; H1'/H2'), 14.89 (s, 1H; H7'), 9.15(s,1H; H8),8.89(s, 1H; H8'), 8.17 (s,1H; H9), 7.97 (s, 1H; H9'), 7.65 (s, 2H; H10/H10'), 5.44 (s, 1H; H7) , 3.72 (s, 1H; H11), 3.19 (s, 2H; H5'/H6'), 2.81 (s, 2H; H12), 2.41 (s, 2H; H7), 1.69 (s, 2H; H15), 1.36 (s, 2H; H13), 1.03 (s,1H; H7), 0.32 (s, 2H; H14), -0.86 (s, 1H; H3'/H4'), -1.16 (s, 1H; H5/H6), -2.35 (s, 1H; H3'/H4'), -4.18 (s, 1H; H7), -4.7 (s, 1H; H1/H2), -8.02 (s, 1H; H1'/H2'), -10.19 ppm (s, 1H; H5/H6), -13.48, (s, 1H; H3/H4) -15.05(s, 1H; H1/H2)

**Tb:***m/z* (ESMS) [M+H]<sup>+</sup> 685.3

**Ln 6,6'-((7-(13-12-dithiolanyl-5-pentaamido-1-carboxypentyl)-1,4,7-triazaacyclononane-1,4-diyl)bis(methylene))dipicolinic acid (Ln.2)**

Ln. 6,6'-((7-(5-amino-1-carboxypentyl)-1,4,7-triazacyclononane-1,4-diyl)bis(methylene))dipicolinic acid (0.073mmoles), thoctic acid (0.043 0.222 mmoles), EDCI (0.222 mmoles) and DMAP (0.222

mmoles) were dissolved in water:DMF (5 mL, 1:1). A precipitate formed, corresponding to the DMAP chloride salt. The solution was stirred for 18 hours and filtered. The volume was then concentrated to exactly 1 mL, the complex purified on a Sephadex G-25 size exclusion column, eluting with water. The aliquots containing the complex were combined as the desired Ln.2 complexes as a hygroscopic solids, in yield for Ln=Gd; 60% for Ln=Eu 59% and for Ln = Tb 61%. Lanthanide complexes are used without further purification;

**Gd.2.**  $m/z$  (ESMS)  $[M+H]^+$  874.3.

**Eu.2:**  $m/z$  (ESMS)  $[M+H]^+$  868.3.  $^1H$  NMR (200 MHz, D<sub>2</sub>O, 278 K): 25.7 (s, 1H; H1'/H2'), 14.89 (s, 1H; H7'), 9.15(s,1H; H8),8.89(s, 1H; H8'), 8.17 (s,1H; H9), 7.97 (s, 1H; H9'), 7.65 (s, 2H; H10/H10'), 5.44 (s, 1H; H7) , 3.72 (s, 1H; H11), 3.19 (s, 2H; H5'/H6'), 2.94 (bm, 7H; H12, H17, H19, H20), 2.72 (bm, H16, H18), 2.41 (s, 2H; H7), 1.69 (s, 2H; H15), 1.36 (s, 2H; H13), 1.03 (s,1H; H7), 0.92 (bm, 4H, H21, H22), 0.32 (s, 2H; H14), -0.86 (s, 1H; H3'/H4'), -1.16 (s, 1H; H5/H6), -2.35 (s, 1H; H3'/H4'), -4.18 (s, 1H; H7), -4.7 (s, 1H; H1/H2), -8.02 (s, 1H; H1'/H2'), -10.19 ppm (s, 1H; H5/H6), -13.48, (s, 1H; H3/H4) -15.05(s, 1H; H1/H2)

**Tb.2**  $m/z$  (ESMS)  $[M+H]^+$  875.3.

## TEM image of Gd.2.QD

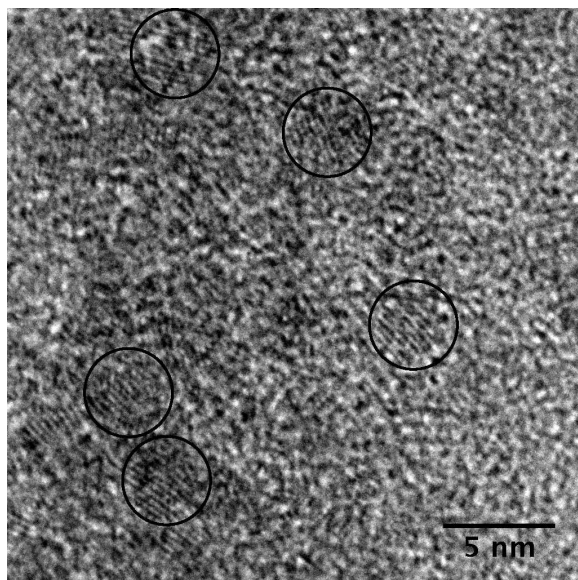

Figure S1: TEM images of Gd.2.QD. The circles drawn in the image show individual InP/ZnS Gd.2.QDs

## Relaxivity measurements

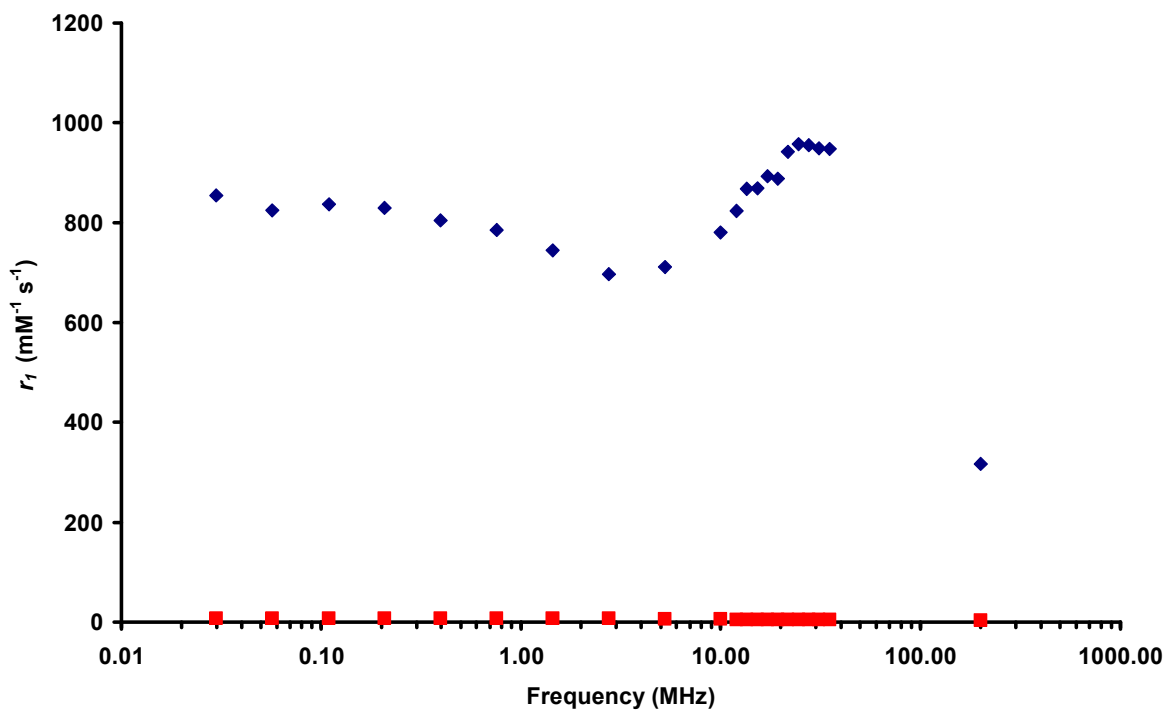

Figure S2: NMRD profile for Gd.2 (red squares) and Gd.2.QD (80 chelates) (Blue diamonds), relaxivity per object in H<sub>2</sub>O at 298 K



## Luminescence Spectroscopy

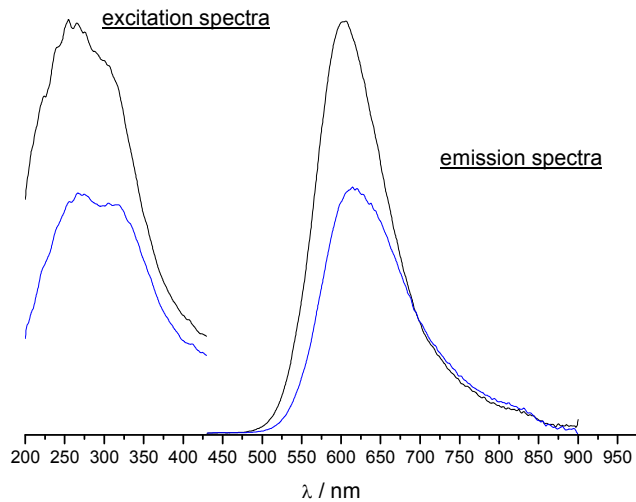

Figure S3: Excitation ( $\lambda_{\text{em}} = 620 \text{ nm}$ ) and emission ( $\lambda_{\text{ex}} = 320 \text{ nm}$ ) spectra of QD-penicilamine (black) and QD.Gd (blue).

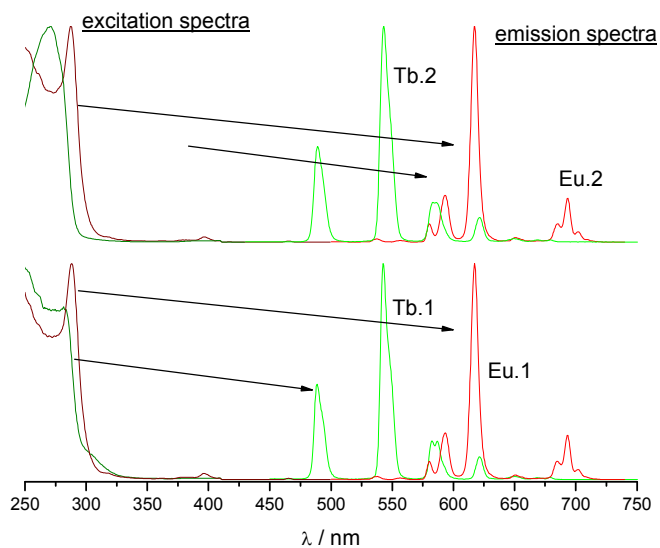

Figure S4: Excitation ( $\lambda_{\text{em}} = 546 \text{ or } 612 \text{ nm}$ ) and emission ( $\lambda_{\text{ex}} = 275 \text{ nm}$ ) spectra Eu.2, Tb.2 (top) Eu.1, Tb.1 (bottom)

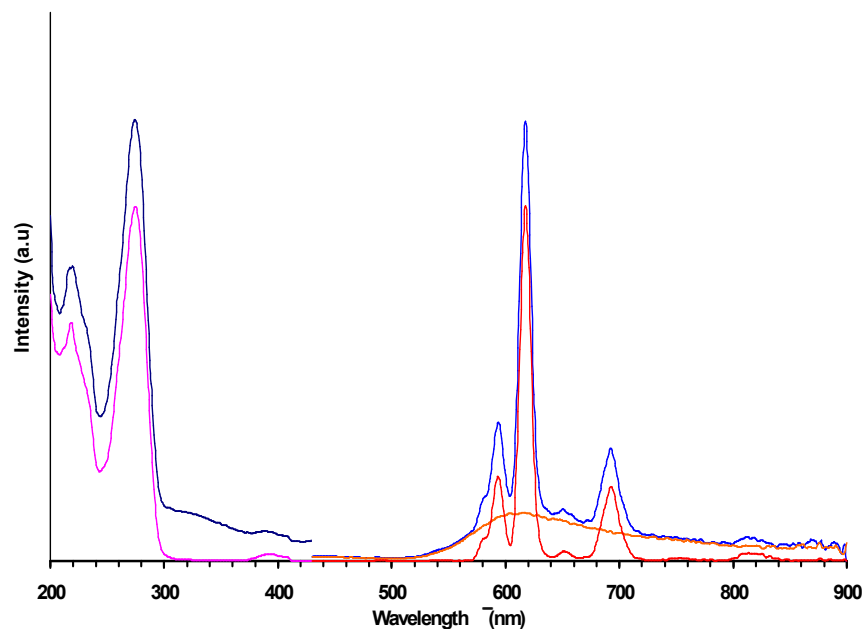

Figure S5. Luminescence spectra for Eu.2.QD, (Left) excitation spectra with  $\lambda_{em} = 617$  nm (dark blue : 0 ms and pink : 0.05 ms delay, respectively); (Right) : emission spectra with  $\lambda_{ex} = 275$  nm (blue : 0 ms delay and red 0.05 ms delay, respectively) and  $\lambda_{ex} = 320$  nm (orange 0 ms delay)

### UV-vis measurements

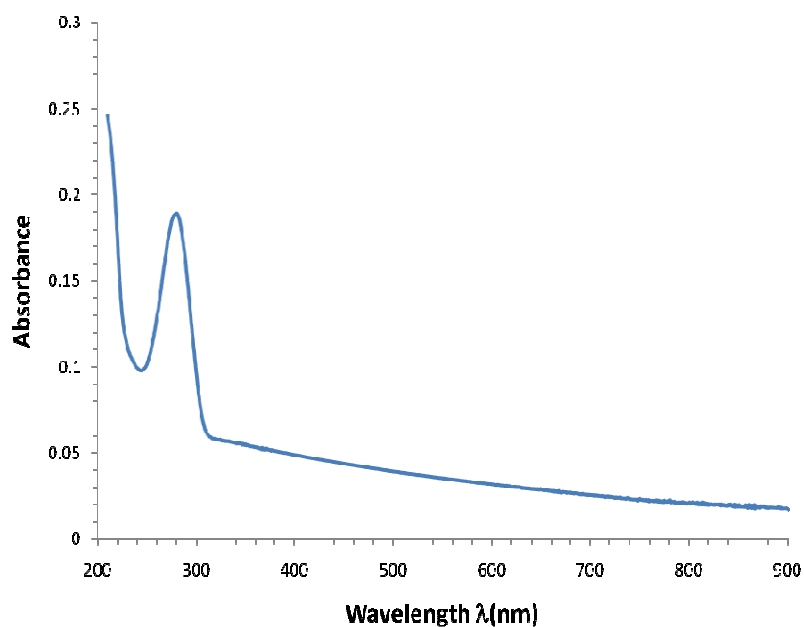

Figure S6. Uv-Vis spectra for Eu.2.QD.

## Lifetime Measurements

Lifetimes measured by direct excitation (275 nm) and  $q$ -values calculated

| Complex | $\tau(\text{H}_2\text{O})$ | $\tau(\text{D}_2\text{O})$ | $q$ |
|---------|----------------------------|----------------------------|-----|
| Eu .1   | 1.5                        | 0.52                       | 1.2 |
| Eu .2   | 1.51                       | 0.53                       | 1.2 |
| Tb.1    | 1.34                       | 1.95                       | 1.1 |
| Tb.2    | 1.35                       | 2.26                       | 1.2 |

## DLS measurements

Table S1.

| Quantum dot              | Size (nm) |
|--------------------------|-----------|
| Quantum dot Penicilamine | 6.9       |
| Eu Grafted Quantum dot   | 9.2       |
| Gd Grafted Quantum dot   | 8.6       |
